# Supplementary material
Source: Research Square preprint supplement (doi:10.21203/rs.3.rs-9790684/v1)
Supplement: Supplementary file 1 [file 3840d5b8b55c4431f9630f2e.xlsx]

## Sheet: Verileri
AdSoyad	Yaş	Boy	Kilo	BKİ	SağKol	SağÖnKol	SağKolToplam	SolKol	SolÖnKol	SolKolToplam	Toplamkol	SağÜstBacak	SağAltBacak	SağBacakToplam	SolÜstBacak	SolAltBacak	SolBacakToplam	Toplambacak	KulaçUzunluğu	SerbestStilYüzme50m	SerbestStilYüzme100m	SerbestStilYüzme200m	SırtüstüYüzme50m	SırtüstüYüzme100m	SırtüstüYüzme200m	KurbağalamaYüzme50m	KurbağalamaYüzme100m	KurbağalamaYüzme200m	KelebekYüzme50m	KelebekYüzme100m	KelebekYüzme200m
Muhammed Harun Doğan	14	174	77	25.4	2794.34	1296.87	4091.21	2608.98	1388.15	3997.13	8088.34	11983.2	5318.38	17301.5	11316	4998.93	16314.9	33616.4	190	30	67	184	34	73	178	43	93	221	29	81	199
Ahmet Eren Turan	16	185	75	21.9	2738.15	1123.55	3861.7	2942.8	1044.94	3987.74	7849.44	11278.8	4644.84	15923.7	11076.1	4463.92	15540	31463.7	196	29	65	180	32	76	175	37	88	209	28	65	180
Mehmet Tahir Eren	15	172	65	22	2145.08	952.344	3097.43	2428.88	884.791	3313.67	6411.1	8606.98	3192.47	11799.5	8136.06	2928.03	11064.1	22863.5	188	34	89	151	40	85	195	45	94	228	44	84	210
Koray Fırtına	16	168	58	20.5	2448.28	697.804	3146.08	2469.27	815.232	3284.5	6430.58	11838.5	3448.12	15286.6	11549.6	3191.86	14741.4	30028	179	35	87	153	41	86	196	44	100	227	43	83	212
Ekrem Melih Koçyiğit	16	169	78	27.3	2819.05	1593.09	4412.13	2910.79	1641.41	4552.19	8964.32	8476.5	3691.72	12168.2	8464.29	3752.55	12216.8	24385.1	174	33	77	158	43	88	200	45	99	228	40	89	215
Metehan Sofulu	16	175	62	20.2	1661.93	864.567	2526.49	1497.47	736.28	2233.75	4760.24	7940.49	2980.27	10920.8	7432.24	2727.04	10159.3	21080	169	29	71	150	44	89	202	43	98	225	39	88	213
Tuncay Efe İnce	14	172	65	22	2190.43	836.814	3027.24	2268.7	934.471	3203.17	6230.41	11590.6	4118.41	15709	11131.5	3886.48	15017.9	30727	184	30	70	151	36	83	181	41	92	218	35	81	195
Doruk Tuna Uygur	14	180	56	17.3	1836.19	597.095	2433.29	1613.83	561.905	2175.73	4609.02	9600.55	2745.45	12346	9213.67	2558.55	11772.2	24118.2	181	29	68	186	35	82	179	39	89	214	34	82	191
Ahmet Akkulak	15	156	43	17.7	1048.84	370.679	1419.52	1059.37	367.221	1426.59	2846.11	7254.6	2342.73	9597.33	6860.59	2191.86	9052.45	18649.8	163	33	85	152	43	89	191	45	97	226	40	91	218
Eren Güldağ	15	165	51	18.7	1320.95	493.161	1814.11	1462.78	564.773	2027.55	3841.66	7956.31	2702.2	10658.5	7738.14	2520.28	10258.4	20916.9	170	34	89	155	44	90	195	46	98	228	39	90	215
Efekan Eraslan	15	176	53	17.1	1822.4	585.933	2408.34	1947.11	642.474	2589.58	4997.92	9677.49	2679.73	12357.2	9506.71	2691.61	12198.3	24555.5	172	31	71	149	38	81	182	40	92	215	34	86	195
Mustafa Doğan	15	170	50	17.3	1746.41	496.386	2242.79	1781.58	498.15	2279.73	4522.52	10446.9	2969.87	13416.7	10145.3	2836.17	12981.4	26398.2	167	32	72	146	40	78	180	39	91	213	36	88	200
Kutay Alp Yazıcı	14	187	70	20	2617.91	1334.04	3951.94	2771.83	1260.74	4032.56	7984.51	12300.6	5309.18	17609.7	11949.4	4806.39	16755.8	34365.5	194	28	61	141	33	72	177	37	88	206	31	78	185
Doruk Küçükgülbaha	14	162	58	22.1	1968.41	702.753	2671.16	1742.79	617.38	2360.17	5031.33	8599.43	2784.94	11384.4	8059.33	2591.47	10650.8	22035.2	170	33	78	149	40	87	196	43	95	218	41	96	208
Yusuf Sağır	15	160	62	24.2	1753.06	784.893	2537.96	1592.63	613.526	2206.16	4744.11	8248.65	3413.21	11661.9	7733.74	3195.32	10929.1	22590.9	155	34	90	161	45	90	200	46	99	225	43	100	219
